1 **Phylogenetic analysis reveals disparate transmission dynamics of *Mycobacterium***  
2 ***tuberculosis*-complex lineages in Botswana**

3

4 Qiao Wang,<sup>1,2</sup> Ivan Barilar,<sup>3</sup> Volodymyr M. Minin,<sup>4</sup> Chawangwa Modongo,<sup>5</sup> Patrick K. Moonan,<sup>6</sup>  
5 Alyssa Finlay,<sup>7</sup> Rosanna Boyd,<sup>7</sup> John E. Oeltmann,<sup>6</sup> Tuduetso L. Molefi,<sup>8</sup> Nicola M. Zetola,<sup>9</sup>  
6 Timothy F. Brewer,<sup>1,10</sup> Stefan Niemann\*,<sup>3,11</sup> Sanghyuk S. Shin\*<sup>2</sup>

7

8 1. Department of Epidemiology, Fielding School of Public Health, University of California Los Angeles,  
9 Los Angeles, CA, USA; 2. Sue & Bill Gross School of Nursing, University of California Irvine, Irvine,  
10 CA, USA; 3. Molecular Mycobacteriology, Forschungszentrum Borstel, Borstel, Germany; 4. Department  
11 of Statistics, University of California Irvine, Irvine, CA, USA; 5. Victus Global Botswana Organisation,  
12 Gaborone, Botswana; 6. Division of Global HIV and Tuberculosis, US Centers for Disease Control and  
13 Prevention, Atlanta, GA, USA; 7. Division of Tuberculosis Elimination, US Centers for Disease Control  
14 and Prevention, Atlanta, GA, USA; 8. National TB Program, Botswana Ministry of Health, Gaborone,  
15 Botswana; 9. Augusta University School of Medicine, Augusta, GA, USA; 10. Division of Infectious  
16 Diseases, University of California Los Angeles, Los Angeles, CA, USA; 11. German Center for Infection  
17 Research (DZIF), Partner Site Hamburg-Lübeck-Borstel-Riems, Borstel, Germany.

18

19 \*These authors have contributed equally to this work.

20

21

## 22 **Abstract**

23 Tuberculosis epidemics have traditionally been conceptualized as arising from a single uniform  
24 pathogen. However, *Mycobacterium tuberculosis*-complex (Mtb), the pathogen causing  
25 tuberculosis in humans, encompasses multiple lineages exhibiting genetic and phenotypic  
26 diversity that may be responsible for heterogeneity in TB transmission. We analysed a  
27 population-based dataset of 1,354 Mtb whole-genome sequences collected over four years in  
28 Botswana, a country with high HIV and tuberculosis burden. We identified Lineage 4 (L4) as the  
29 most prevalent (87.4%), followed by L1 (6.4%), L2 (5.3%), and L3 (0.9%). Within L4, multiple  
30 sublineages were identified, with L4.3.4 being the predominant sublineage. Phylodynamic  
31 analysis revealed L4.3.4 expanded steadily from late 1800s to early 2000s. Conversely, L1, L4.4,  
32 and L4.3.2 showed population trajectories closely aligned with the HIV epidemic. Meanwhile,  
33 L2 saw rapid expansion throughout most of the 20<sup>th</sup> century but declined sharply in early 1990s.  
34 Additionally, pairwise genome comparison of Mtb highlighted differences in clustering  
35 proportions due to recent transmission at the sublineage level. These findings emphasize the  
36 diverse transmission dynamics of strains of different Mtb lineages and highlight the potential  
37 for phylodynamic analysis of routine sequences to refine our understanding of lineage-specific  
38 behaviors.

## 39 Introduction

40 Despite being preventable and curable, tuberculosis (TB) claims an estimated 1.4 million  
41 lives each year worldwide, surpassing deaths caused by any other infectious disease besides  
42 severe acute respiratory syndrome coronavirus-2 (SARS-CoV-2).<sup>1</sup> The SARS-CoV-2 pandemic  
43 highlighted the public health importance of monitoring the spread of different genomic variants  
44 globally and in local settings.<sup>2</sup> Indeed, genomic epidemiology has been instrumental in outbreak  
45 investigation and public health over the previous decade by tracing the spread of various  
46 infectious pathogens and informing key stakeholders. For instance, genomic surveillance of viral  
47 pathogens guided Ebola vaccine allocation in west Africa during the 2013–2016 outbreak,<sup>3</sup>  
48 identified likely source and routes of zika virus introductions into the United States during the  
49 2016 outbreak,<sup>4</sup> and has continuously mapped transmission networks and detected high-risk  
50 groups in the ongoing HIV pandemic.<sup>5, 6</sup> These findings are facilitated through the use of  
51 phylodynamics, a statistical framework that integrates high-resolution genetic data with  
52 individual-level epidemiological data to shed light on the transmission dynamics of infectious  
53 pathogens, providing timely guidance for public health interventions.<sup>7, 8</sup>

54 For TB research, large-scale comparative genomic analysis have provided valuable  
55 insights into the origin and genetic diversity of the human-adapted TB bacteria, collectively  
56 known as the *Mycobacterium tuberculosis*–complex (Mtb).<sup>9, 10</sup> There are currently a total of 9  
57 major lineages of Mtb and 64 sublineages that characterize their genetic diversity according to a  
58 62-single nucleotide polymorphism (SNP) barcode.<sup>11, 12, 13</sup> Strain diversity in Mtb can lead to  
59 important phenotypic variations in virulence, antibiotic resistance patterns, and transmissibility.<sup>14,</sup>  
60 <sup>15</sup> For example, Lineages 2 and 4 are widespread globally and noted for their enhanced  
61 transmissibility, as evidenced by comparing Mtb genomes (*e.g.*, genotypic clustering

62 proportions) collected in many settings.<sup>16, 17</sup> By contrast, Lineage 1 is less likely to cause disease  
63 shortly after infection and may have a reduced ability to spread.<sup>14, 16, 17</sup> However, most  
64 epidemiological studies and surveillance efforts still do not distinguish between Mtb strains,  
65 and the conventional approach of treating TB as a uniform epidemic fails to account for pathogen  
66 heterogeneity and potential differences in the transmission dynamics of Mtb strains, which  
67 could vary significantly across different regions and populations.<sup>14, 18, 19</sup> Much like the insights  
68 for viral transmission dynamics gained from genomic surveillance of SARS-CoV-2 variants,<sup>2</sup>  
69 analysing Mtb sequences to uncover long-term epidemiological trends of specific Mtb strains  
70 may offer a more granular understanding of the TB transmission dynamics at the population  
71 level, which could improve our ability to predict the trajectory of the TB epidemic and design  
72 more tailored interventions for a given setting.

73        Located in southern Africa, Botswana continues to face one of the most severe TB  
74 endemics globally and remains one of the 30 high TB/HIV burden countries.<sup>1</sup> Despite the public  
75 health implications, the evolutionary history and transmission dynamics of Mtb lineages remain  
76 poorly understood in this high burden country. In this study, we sought to expand our  
77 understanding of the Mtb population dynamics underlying the long-standing TB endemic in  
78 Botswana by leveraging a countrywide dataset of whole genome sequences (WGS) from Mtb  
79 isolates collected over four years.<sup>20</sup> Our aim was to delineate the long-term spread of Mtb  
80 subpopulations in the context of sociohistorical events and the generalized HIV epidemic in the  
81 region. In addition to the broader long-term trends revealed through phylodynamic analysis, we  
82 also examined clustering of cases by Mtb lineages based on pairwise genetic distances to track  
83 recent transmission patterns. We hypothesized that TB in Botswana is composed of a collection  
84 of heterogeneous epidemics driven by distinct transmission dynamics of Mtb lineages.

85

## 86 **Results**

### 87 *Distribution of Mtb lineages in Botswana*

88 During the study period, 1,426 Mtb isolates underwent successful WGS and were  
89 assigned into known lineages based on lineage-specific SNPs. We excluded 72 isolates with  
90 evidence of mixed Mtb strain infection for subsequent phylogenetic and phylodynamic analysis.

91 Among the remaining 1,354 isolates, 1,184 belonged to lineage 4 (L4; 87.4%), 86 (6.4%) were  
92 classified as lineage 1 (L1), 72 (5.3%) were lineage 2 (L2), and 12 (0.9%) were lineage 3 (L3).

93 L4 was found to encompass a number of sublineages, including L4.1 (n=2; 0.1%), L4.1.1 (n=141;  
94 10.4%), L4.1.2 (n=149; 11.0%), L4.2.2 (n=1; 0.1%), L4.3.2 (n=117; 8.6%), L4.3.3 (n=27; 2.0%),

95 L4.3.4 (n=400; 29.5%), L4.4 (n=189; 14.0%), L4.6 (n=2; 0.1%), L4.7 (n=14; 1.0%), L4.8 (n=92;  
96 6.8%), and L4.9 (n=50; 3.7%). Within L1, 22 (1.6%) were L1.1 and 64 (4.7%) were L1.2. All of

97 the L2 isolates were classified as L2.2 (Figure 1). Furthermore, Gaborone harbored more Mtb  
98 strain diversity compared to Ghanzi. L4.3.4, the most prevalent sublineage, was found in higher

99 proportion in Ghanzi than Gaborone (67% vs. 21%; Table 1). Host characteristics were similar  
100 among the major Mtb lineages (Table 2).

### 101 *Historical origins and population dynamics of Mtb lineages*

102 Demographic reconstruction was performed for L1, L2, L4.1.1, L4.1.2, L4.3.2, L4.3.4,  
103 L4.4, and L4.8. The time to the most recent common ancestor (MRCA) refers to the estimated

104 age of a common ancestral population from which current populations or strains of Mtb have  
105 descended. We inferred the MRCA to have emerged around year 1727 (95% highest posterior

106 density interval [HPDI], 1607–1828) and 1900 (95% HPDI 1854–1938) for strains of L1 and L2,  
107 respectively. Time to MRCA varied among L4 sublineages, ranging from year 1695 for L4.1.2

108 (95% HPDI 1546–1817) to 1941 for L4.3.2 (95% HPDI 1911–1966; Table 3). Our analysis  
109 revealed that strains of L4.3.4 experienced a steady expansion from late 1800s to early 2000s,  
110 and remained the most prevalent sublineage in recent years. Similar population trajectory was  
111 observed for L1 and L4.4 strains, with a substantial expansion observed from the late 1970s for  
112 two decades, followed by a continuous decline from the late 1990s. For L4.3.2 strains, we  
113 observed significant growth between 1980 to early 2000s, followed by a sharp reduction  
114 afterward. L2 strains experienced a steady increase in population growth between 1940 and early  
115 1990s, followed by a steep decline until 2000, after which the population plateaued followed by  
116 a second decline around 2012. Other L4 sublineages experienced several waves of expansion and  
117 contraction. Except for L4.1.1, all other Mtbc lineages underwent contraction after early 2000s  
118 (Figure 2 and Supplementary Figure 1). For the inferred clock rate and maximum clade  
119 credibility trees of these lineages, refer to Supplementary Table 1 and Supplementary Figure 2a-h.

## 120 Genomic clustering analysis

121 Using a 5-SNPs cutoff as an indicator of recent transmission, 48% of the isolates  
122 (652/1354) were clustered. The cluster sizes varied, ranging from 2 isolates per cluster to 23  
123 isolates in the largest cluster. The median cluster size for each lineage was as follows: L1 and L2:  
124 2 (range: 2–7), L4.1.1: 3 (range: 2–23), L4.1.2: 3 (range: 2–12), L4.3.2 and L4.4: 2 (range 2–8),  
125 L4.3.4: 2 (range: 2–19), and L4.8: 3.5 (range: 2–9). Compared to L1, we found that isolates  
126 belonging to any other lineages were more likely to be part of a cluster (Table 4). Isolates  
127 belonging to L2, L4.1.1, and L4.8 had the highest cluster proportion. Additionally, the cluster  
128 proportion for the predominant L4.3.4 was significantly higher in Ghanzi than Gaborone (57%  
129 vs. 40%;  $p$ -value <0.001; data not shown) These findings remained robust when we repeated the  
130 analysis using a 12-SNPs cutoff (Supplementary Table 2).

131

## 132 **Discussion**

133 Few studies to date have examined lineage-specific, long-term transmission dynamics of  
134 Mtb strains in a high HIV/TB setting, largely due to the lack of population-level WGS datasets  
135 over extended sampling periods.<sup>16, 21</sup> By reconstructing the evolutionary history and spread of  
136 Mtb strains of different lineages using WGS collected over a four-year period, we observed  
137 varying transmission dynamics and demographic trajectories for extant lineages circulating in  
138 Botswana. The expansion of many lineages coincided with the onset of the HIV/AIDS epidemic,  
139 while their contraction aligned with the implementation of antituberculosis and antiretroviral  
140 treatment programs.

141 With the exception of strains of L4.1.1, L4.1.2 and L4.8, strains of most lineages  
142 experienced an expansion of various magnitude in the second half of the 20th century,  
143 correlating closely with the region's high TB burden.<sup>22</sup> Notably, this period coincides with the  
144 emergence and rapid escalation of the HIV epidemic. Botswana experienced one of the world's  
145 most severe HIV epidemics, with initial cases emerging in the 1980s.<sup>23</sup> A phylodynamic study of  
146 HIV dated the virus's emergence in Botswana around 1960, followed by rapid growth until  
147 stabilization post-1990.<sup>24</sup> HIV increases the susceptibility of TB disease and is the strongest risk  
148 factor for reactivating latent TB infections due to compromised immunity.<sup>25</sup> Further, the HIV  
149 crisis was exacerbated by rapid urbanization driven by economic growth in the mining industry.  
150 A network analysis of micro-census data from Botswana between 1981 and 2011 suggests a  
151 highly mobile population with considerable movement between urban and rural areas.<sup>26</sup> Mining  
152 towns, where HIV cases initially emerged, acted as major migration hubs for both inflow and  
153 outflow of populations. In Selebi Phikwe, a mining town for copper and nickel in Botswana, HIV

154 prevalence had surged to 50% in 2000.<sup>27</sup> These towns also became hubs of TB transmission due  
155 to the high-risk conditions associated with mining and the growing HIV prevalence.<sup>28, 29</sup> As the  
156 HIV epidemic escalated, the number of individuals susceptible to Mtb infection and reactivation  
157 increased, driving the expansion of Mtb populations. Thus, the intersection of the HIV epidemic,  
158 mining-driven urbanization, and high population mobility likely played a critical role in the  
159 significant expansion of strains from most Mtb lineages in the latter part of the 20th century.  
160 Nevertheless, this expansion was not observed across all lineages. It's possible that Mtb strains  
161 may exhibit varying capacities for TB transmission or reactivation influenced by their  
162 interactions with the host in the context of HIV-related immunosuppression.<sup>15, 17, 30</sup> We observed  
163 a marked decline in Mtb populations at the turn of the 21st century, which aligned with a  
164 consistent decrease in TB incidence from 2000 to 2016.<sup>31</sup> Several nationwide programs likely  
165 contributed to the reduction. The most significant decrease in L1, L4.3.2, L4.3.4, L4.4, and L4.8  
166 occurred beginning the early 2000s, coinciding with the launch of the Masa Antiretroviral  
167 Therapy (ART) Programme in 2002.<sup>23</sup> This program, also known as the Masa Programme,  
168 initially aimed to provide free ART to individuals with advanced immune suppression but  
169 eligibility expanded over the years. "Masa" means "new dawn" in Setswana, symbolizing hope  
170 and a fresh start for those affected by the epidemic. Shortly after, the President's Emergency Plan  
171 for AIDS Relief (PEPFAR) was launched, focusing on combating HIV/AIDS globally, with a  
172 significant emphasis on sub-Saharan Africa.<sup>32</sup> Botswana, with its high HIV prevalence rates, was  
173 a key focus country for PEPFAR. Both initiatives aimed to support those affected by HIV/AIDS  
174 through comprehensive treatment, prevention, and care programs, thereby reducing HIV  
175 transmission.<sup>23, 32, 33</sup> As a result, Botswana had significantly increased number of people  
176 receiving ART, reduced the rate of new HIV infections, and improved the overall healthcare



177 system's capacity to manage HIV/AIDS.<sup>32, 33, 34</sup> While PEPFAR and Masa Programme primarily  
178 targeted the HIV/AIDS epidemic, their impact on reducing HIV transmission indirectly led to a  
179 significant reduction in the burden of TB in Botswana.

180 Our study highlighted significant heterogeneity in transmission dynamics among strains  
181 of different Mtb lineages analysed. We found that L1 strains maintained a relatively stable  
182 effective population size until experiencing a significant expansion following the emergence of  
183 HIV. L1 is most prevalent in regions bordering the Indian Ocean, and several large-scale  
184 phylogeographic studies have shown that South Asia and eastern Africa played critical roles in  
185 dispersing this lineage via maritime trade.<sup>35, 36</sup> It is possible that MRCA of L1 strains was  
186 introduced into Botswana through subsequent migrations between eastern and southern regions  
187 of the continent. Post establishment, evidence suggests that L1 likely expanded due to changing  
188 environmental conditions (*e.g.* increased population densities, malnutrition, immunosuppression),  
189 rather than from large migration or transmission events.<sup>35</sup> Consistent with previous findings, our  
190 study found that L1 had the lowest proportion of cases that belonged to clusters.<sup>14, 16, 37</sup> A  
191 phylodynamic study from Vietnam, an L1-endemic region, concluded that compared to L2 and  
192 L4, the disease burden due to L1 in the region was associated with reactivation of long-term  
193 remote infections, evidenced by larger SNP differences and limited inferred migration events  
194 among L1 isolates.<sup>38</sup> Similarly, in Botswana, reactivation of latent TB infections likely  
195 contributes to new cases of L1 and may have driven this lineage's expansion as population  
196 immunity waned due to HIV. L4.4 strains followed similar demographic trends but showed a  
197 slower decline in population size after nationwide introduction of ART interventions, which may  
198 be linked to its higher proportion of clustered cases due to recent transmission compared to L1  
199 strains.

200 Notably, L2 strains underwent rapid expansion in effective population size shortly after  
201 their estimated emergence in the early 20th century. Phylogenetic studies suggest that L2.2, often  
202 associated with the Beijing genotype, likely originated in China.<sup>21, 39</sup> The 19th and 20th centuries  
203 were characterized by intense interaction between Europe and China, driven by trade, imperial  
204 ambitions, and cultural exchanges. Following the Opium Wars, numerous Chinese cities became  
205 treaty ports where European powers had extraterritorial rights and conducted trade with relative  
206 freedom. Prominent treaty ports included Shanghai, Guangzhou, and Tianjin, which became hubs  
207 of international trade and cultural exchange. Additionally, during the late 19th and early 20th  
208 centuries, Chinese laborers were often recruited for mining and railway construction projects  
209 worldwide, including in Africa.<sup>40</sup> South Africa, which borders Botswana, had a significant  
210 number of Chinese laborers working in its mines.<sup>51</sup> This movement could have facilitated the  
211 introduction and spread of L2.2 (with putative origins in Beijing, China) to southern Africa.<sup>50</sup> L2  
212 has been associated with hypervirulence (ability to cause disease shortly after infection) and high  
213 transmissibility, supported by both clinical evidence and animal experiments.<sup>41, 42</sup> In our study,  
214 we also observed that L2 had one of the highest proportions of genomic clustering due to recent  
215 transmission. However, L2 strains experienced a decline in the early 1990s before the  
216 implementation of country-wide ART programs. This decline might reflect a combination of  
217 factors, including implementation of facility-based directly observed therapy, local pathogen-  
218 host dynamics and its challenges in competing with other well-adapted indigenous lineages.<sup>15</sup>  
219 The discrepancy between high genotypic clustering proportion and population dynamic of L2  
220 strains in Botswana highlights that genotypic clustering analysis alone does not necessarily  
221 capture the dynamics of an epidemic, nor does it always correlate with the population size of a  
222 specific Mtb lineage. Our finding also contrasts sharply with the phylodynamic study in

223 Vietnam, where L2 showed clear patterns of overtaking endemic L1 strains over time.<sup>38</sup> Overall,  
224 these findings imply that the competitive dynamics between strains of different lineages can vary  
225 significantly depending on the region and the specific lineages involved, and that studying  
226 lineage features without accounting for geographic or host genetic background can obscure  
227 important host-pathogen interactions.<sup>15, 43</sup>

228 Our analysis indicates that most TB cases in Botswana were caused by L4 strains,  
229 specifically L4.3 strains. This finding aligns with previous reports of L4-belonging Latin  
230 American and Mediterranean sublineage's dominant presence in southern Africa region.<sup>44, 45, 46, 47</sup>  
231 Based on the sampled genetic diversity, we estimated that most L4 sublineages trace back to  
232 MRCA that emerged between the late 17th and 19th centuries. Recent genomic studies of Mtb  
233 suggests that the introduction and spread of L4 coincide with historical events involving  
234 European colonization and subsequent socioeconomic changes.<sup>44, 48</sup> European colonization of  
235 South Africa, Botswana's neighboring country, began in earnest with the establishment of a  
236 Dutch settlement at the Cape of Good Hope in 1652.<sup>49</sup> Later, British colonization intensified in  
237 early 19th century, and Botswana (then Bechuanaland) became a British protectorate in 1885.  
238 The establishment of colonial administration and subsequent movements of European settlers  
239 between Europe, South Africa and Botswana during this period may have facilitated the  
240 establishment and spread of L4 strains still observed today.

241 The most common Mtb lineage found in Botswana was L4.3.4, and it was  
242 overwhelmingly more prevalent in Ghanzi than Gaborone (67% vs. 21%). Another study using a  
243 different genotyping technique noted this, but was unable to differentiate whether it was due to  
244 recent transmission or reactivation of latent infections.<sup>50</sup> The effective population size of L4.3.4  
245 strains grew steadily since its introduction around 1880 and only began to decline slightly after

246 country-wide ART programs began. Unlike other lineages, L4.3.4's expansion during the HIV  
247 epidemic was modest. This contrast may be explained by the higher prevalence of this lineage in  
248 Ghanzi, which has lower HIV prevalence compared to Gaborone. Prior to the study,  
249 approximately 36% of TB patients in Ghanzi were coinfecting with HIV, compared to 70% in  
250 Gaborone,<sup>51</sup> suggesting a less pronounced impact of the HIV epidemic on TB transmission  
251 dynamics in Ghanzi. In our analysis, L4.3.4 displayed moderate clustering proportions due to  
252 recent transmission, falling between the lowest (L1) and the highest groups (e.g., L2, L4.1.1,  
253 L4.8). However, it exhibited significantly higher cluster proportions in Ghanzi compared to  
254 Gaborone. Taken collectively, we propose that the success of L4.3.4 is driven primarily by  
255 sustained ongoing transmission, rather than reactivation of latent infections.<sup>50</sup> This highlights the  
256 need for public health efforts to prioritize activities that interrupt transmission, such as enhancing  
257 contact tracing,<sup>52</sup> improving infection control measures,<sup>53</sup> and ensuring timely diagnosis and  
258 treatment to reduce disease burden, especially in a rural setting like Ghanzi.<sup>54</sup>

259 L4.3.4 displayed clear competitive advantage as evidenced by its dominant presence in  
260 both districts despite not being the earliest lineage to emerge in Botswana. It's also interesting to  
261 observe that L4.3.2, a strain closely related to L4.3.4, emerged around the time of estimated HIV  
262 introduction in Botswana.<sup>24</sup> However, unlike L4.3.4's steady growth, L4.3.2 experienced a rapid  
263 expansion followed by a sharp decline, mirroring remarkably well with the timing of the HIV  
264 epidemic. The striking difference in population dynamics between two closely related strains  
265 warrant further investigation to determine whether strain-specific mutations contribute to distinct  
266 phenotypes, and/or if potential host-pathogen interactions influence their respective trajectories  
267 and the success of L4.3.4.

268 L4.1.1, L4.1.2, and L4.8 strains share similar demographic trends with large overlapping  
269 CIs. Notably, L4.1.1 and L4.8 exhibited the highest cluster proportions due to recent  
270 transmission, almost doubling the estimate compared to L4.3.4. This variation in genotypic  
271 clustering within L4 sublineages was also observed in San Francisco, USA,<sup>55</sup> underscoring  
272 sublineage-level heterogeneity and the necessity of investigating them individually. Furthermore,  
273 L4.1.1 was the only lineage that expanded after the implementation of country-wide ART  
274 programs. In addition to possible sublineage-specific characteristics (*e.g.* virulence), other  
275 socioecological drivers, for example, overcrowding or malnutrition, may be responsible for the  
276 expansion and contraction of this sublineage.<sup>56</sup> However, the relatively wide CIs associated with  
277 the effective population size of these sublineages limit our ability to analyze local features of  
278 their curves.<sup>57</sup>

279 Our study had limitations. First, the available genetic data may not fully represent the  
280 diversity of Mtb strains circulating in Botswana. However, the greater Gaborone and Ghanzi  
281 district encompass a considerable segment (20%–25%) of the total population, and sampling in  
282 Gaborone likely captured a substantial portion of Mtb strain diversity due to its role as a central  
283 urban hub for inflow and outflow of population. Second, Mtb isolates were limited to sputa. It is  
284 possible that some lineages may be under-represented because of the predication for pulmonary  
285 clinical presentation.<sup>58</sup> Third, coalescent models (*e.g.* Skyride model applied in our analysis) use  
286 pathogen genomic data to estimate the timescale of population dynamics.<sup>59</sup> The relatively low  
287 mutation rate of Mtb can result in broad uncertainty intervals for estimated effective population  
288 sizes and divergence times, making it challenging to pinpoint precise timings for events such as  
289 introductions or expansions of lineages. Inclusion of Mtb sequences as they become available in  
290 the future may improve the reconstruction of Mtb population dynamics and reduce uncertainty

291 associated with population parameters. Lastly, we acknowledge the limitation of using a fixed-  
292 SNP threshold to determine transmission clusters.<sup>60</sup> The chosen threshold is often arbitrary and  
293 might not accurately reflect recent transmission. However, a SNP cutoff provides a standardized  
294 approach, making it easier to compare results across different studies and useful for public health  
295 investigations. The chosen 5-SNP cutoff for determining TB transmission clusters is common in  
296 molecular epidemiology and has been shown to provide an informative overview of local  
297 transmission patterns.<sup>61, 62</sup>

298 In summary, our study provides insight into the recent evolutionary origins and  
299 population dynamics of strains of different Mtb lineages in Botswana. We highlight the  
300 heterogeneous transmission dynamics of key lineages circulating in Botswana and emphasize  
301 that increasing awareness of these heterogeneities may be essential to further reducing TB  
302 burden. Similar to viral pathogens, we recommend routine molecular surveillance and  
303 phylodynamic analysis to monitor local TB transmission. This could enable public health  
304 programs to effectively track the spread of different Mtb strains, identify those that are  
305 expanding over time, and tailor control strategies based on the epidemiological trends of  
306 circulating Mtb strains within a setting.

307

## 308 **Methods**

### 309 *Data source and study setting*

310 Data were obtained from a population-based TB study conducted between 2012 and 2016.  
311 Study procedures have been described in detail elsewhere.<sup>20</sup> Briefly, the study enrolled  
312 individuals of all ages with presumed TB in the greater Gaborone and Ghanzi districts of  
313 Botswana. Gaborone, located in the southeast and bordering South Africa, is the capital city with

314 a high population density of 1,370 persons/km<sup>2</sup> in 2011. In contrast, Ghanzi is a rural district  
315 located in western Botswana with the lowest population density in the country according to the  
316 2011 census, at 0.37 persons/km<sup>2</sup>.<sup>63</sup> Despite Ghanzi's low population density, it consistently has  
317 the highest TB incidence in the country. Prior to the study, the TB incident rate per 100,000  
318 people in Botswana, and Gaborone and Ghanzi districts were approximately 445, 440, and 722  
319 cases, respectively.<sup>64</sup>

320 During the enrollment process, participants without a documented HIV status or with  
321 negative test results over 12 months old were offered rapid HIV testing. Each participant was  
322 required to provide at least one expectorated sputum sample. Sputum induction with nebulized  
323 hypertonic saline solution was performed for those who had difficulty producing sputum  
324 spontaneously. The Kopanyo Study was approved by the U.S. Centers for Disease Control and  
325 Prevention, the Botswana Ministry of Health and Wellness, and the University of Pennsylvania  
326 Institutional Review Boards. Additionally, approval of this secondary data analysis was obtained  
327 from University of California at Irvine Institutional Review Board. Written informed consent  
328 was obtained from all participants prior to enrollment.

### 329 *Culture and DNA extraction*

330 The sputum specimens underwent decontamination using the N-acetyl-L-cysteine and  
331 sodium hydroxide method. After processing, the specimens were inoculated into Mycobacteria  
332 Grow Indicator Tubes (MGIT) 960 system (Becton Dickinson Microbiology Systems, Sparks,  
333 MD, USA) at the Botswana national reference laboratory in Gaborone. Weekly monitoring of  
334 mycobacteria growth occurred, and if no growth was observed within 8 weeks, it was classified  
335 as culture negative. For culture positive colonies, Mtb DNA was extracted with GenoLyse kit  
336 (Hain Lifescience, Germany) following the manufacturer's protocol. Genomic extracts were

337 stored at -80°C, and those containing a sufficient amount of DNA (at least 0.05ng/uL) were sent  
338 to the Research Center Borstel for WGS.

### 339 *Whole genome sequencing and bioinformatics*

340 Genomic libraries were prepared with Illumina Nextera XT kit to generate 2x150bp  
341 paired-end reads for sequencing using the Illumina NextSeq 500 platform. An automated  
342 bioinformatics pipeline, MTBseq, was used for WGS data analysis.<sup>65</sup> MTBseq combined all  
343 necessary steps needed for analysis of WGS data. Briefly, raw sequences were aligned to the  
344 pan-susceptible, H37Rv reference genome (GenBank NC000962.2) with BWA-mem software  
345 and Samtools. Next, base call recalibration and realignment of reads around insertions and  
346 deletions was performed with GATKv3. Variant calling was performed using Samtools mpileup  
347 and in-house scripts, and positions were considered reliable with 75% allele frequency, at least 4  
348 calls with a phred score of 20 or more, and a minimum of 4 reads mapped in each direction  
349 (forward and reverse orientation). Libraries were considered as high quality and further analyzed  
350 when at least 50x coverage was achieved and 95% of the reference genome covered. Next,  
351 genomes were annotated with known associations to antibiotic resistance. Finally,  
352 phylogenetically informative SNPs based on existing literature were used for lineage  
353 classification of the input samples,<sup>13</sup> excluding genes associated with antibiotic resistance,  
354 insertions and deletions, repetitive regions (PPE and PE-PGRS gene families), and consecutive  
355 variants in a 12bp window.

### 356 *Phylogenetic reconstruction*

357 We extracted variable sites from whole genome alignments of Mtb isolates to create the  
358 fasta files used for phylogenetic analysis. To illustrate the overall population structure of Mtb  
359 lineages in Botswana, we used IQ-TREE v1.6.12 to reconstruct maximum likelihood



360 phylogenies for each major Mtb lineage, with isolates possibly containing mixed Mtb strains  
361 excluded from the dataset.<sup>66</sup> The Hasegawa, Kishino, and Yano (HKY) model of nucleotide  
362 evolution was assumed,<sup>67</sup> and SNP ascertainment bias correction was specified. Additionally,  
363 time-measured phylogenetic trees for specific lineages included in the coalescent-based analysis  
364 were estimated using Bayesian method with details described below.

### 365 *Coalescent-based demographic reconstruction*

366 We reconstructed Mtb population dynamics for L1, L2, and L4 sublineages that had at  
367 least 70 samples using BEAST v1.10.4.<sup>68</sup> The HKY nucleotide substitution model with gamma-  
368 distributed rate heterogeneity (discretized to 4 categories) was used.<sup>67</sup> We specified a strict  
369 molecular clock model, with the substitution rate assumed to be distributed lognormal with a  
370 mean of 1 and a sigma of 1.25. This prior translates to 95% of the probability mass between 0.09  
371 and 4.2 SNPs per site per year (s/s/y). We also explored alternative priors more aligned with the  
372 published substitution rate of Mtb,<sup>69</sup> such as a lognormal distribution with a mean of 0.001 and  
373 a sigma of 2 (i.e. 95% of probability mass between 2.4E-10 and 0.001 s/s/y), as well as a uniform  
374 distribution with upper and lower bounds set to 5E-7 and 1E-8 s/s/y, respectively. However, the  
375 posterior clock rate remained robust to these different prior specifications. To estimate the  
376 mycobacterial population size change through time, we adopted the coalescent-based Gaussian  
377 Markov random fields Bayesian Skyride tree prior.<sup>59</sup> This approach offers greater flexibility  
378 compared to the Bayesian Skyline prior and does not require strong prior assumptions on the  
379 number of population size change points. Furthermore, to account for ascertainment bias, we  
380 made manual adjustments in the xml file to incorporate the number of invariant sites. This  
381 correction was applied individually for each xml file corresponding to a specific lineage. The  
382 Markov chain Monte Carlo (MCMC) chain for each lineage ran for 500 million iterations, with

383 parameters and trees sampled every 50,000th iteration. We verified adequate mixing and  
384 posterior convergence using Tracer v1.7.2 after discarding the first 10% as burn-in. For a  
385 parameter to be considered sufficiently sampled, we aimed for an effective sample size of at least  
386 200. If any parameter fell short of this threshold, we ran a second chain of 500 million iterations  
387 and combined the chains using LogCombiner v1.10.4. We note that L4.3.4 – the largest  
388 sublineage in our dataset – was the only one that required a second MCMC chain of 500 million  
389 iterations to achieve sufficient mixing and sampling. Finally, a consensus tree summarizing the  
390 sampled posterior trees for each lineage was constructed using the maximum clade credibility  
391 method.

#### 392 *Genomic clustering analysis*

393 We explored differences in patterns of recent transmission between Mtb lineages that  
394 were included in the coalescent analysis. Genetically similar Mtb strains under a pre-specified  
395 SNP threshold (usually between 5 and 12-SNPs) are interpreted as a consequence of recent  
396 transmission events<sup>61</sup>. We assigned cases into clusters, which was defined as two or more  
397 individuals with Mtb strains sharing  $\leq 5$ -SNPs differences, as determined by pairwise SNP  
398 comparison.<sup>61, 62</sup> Next, we regressed clustered or non-clustered case on Mtb lineage in a logistic  
399 model, adjusting for potential confounding by age, gender, enrollment district, and HIV status.  
400 To evaluate the robustness of our findings, we also conducted logistic regression analysis using a  
401 12-SNPs cutoff for identifying clustered cases. All statistical analysis and phylogenetic tree  
402 visualizations were conducted in R version 4.2.0.<sup>70</sup> WGS data from this study has been submitted  
403 to the European Nucleotide Archive (ENA) under study accession PRJEB:62480.

404

## References

- 405  
406  
407 1. World Health Organization. Global Tuberculosis Report 2023. World Health Organization  
408 (2023).
- 409 2. Walensky, R. P., Walke H. T., Fauci A. S. SARS-CoV-2 variants of concern in the United  
410 States-challenges and opportunities. *JAMA* **325**, 1037-1038 (2021).
- 411 3. Kinganda-Lusamaki, E., *et al.* Integration of genomic sequencing into the response to the  
412 Ebola virus outbreak in Nord Kivu, Democratic Republic of the Congo. *Nature Medicine*  
413 **27**, 710-716 (2021).
- 414 4. Grubaugh, N. D., *et al.* Genomic epidemiology reveals multiple introductions of Zika  
415 virus into the United States. *Nature* **546**, 401-405 (2017).
- 416 5. Yuan, D., *et al.* HIV-1 genetic transmission networks among people living with  
417 HIV/AIDS in Sichuan, China: a genomic and spatial epidemiological analysis. *Lancet*  
418 *Reg Health West Pac* **18**, 100318 (2022).
- 419 6. Skaathun, B., *et al.* HIV-1 transmission dynamics among people who inject drugs on the  
420 US/Mexico border during the COVID-19 pandemic: a prospective cohort study. *Lancet*  
421 *Reg Health Am* **33**, 100751 (2024).
- 422 7. Attwood, S. W., Hill S. C., Aanensen D. M., Connor T. R., Pybus O. G. Phylogenetic and  
423 phylodynamic approaches to understanding and combating the early SARS-CoV-2  
424 pandemic. *Nat Rev Genet* **23**, 547-562 (2022).
- 425 8. Rife, B. D., *et al.* Phylodynamic applications in 21(st) century global infectious disease  
426 research. *Glob Health Res Policy* **2**, 13 (2017).

- 427 9. Bos, K. I., *et al.* Pre-Columbian mycobacterial genomes reveal seals as a source of New  
428 World human tuberculosis. *Nature* **514**, 494-497 (2014).
- 429 10. Comas, I., *et al.* Out-of-Africa migration and Neolithic coexpansion of *Mycobacterium*  
430 tuberculosis with modern humans. *Nat Genet* **45**, 1176-1182 (2013).
- 431 11. Coscolla, M., *et al.* Phylogenomics of *Mycobacterium africanum* reveals a new lineage  
432 and a complex evolutionary history. *Microb Genom* **7**, (2021).
- 433 12. Ngabonziza, J. C. S., *et al.* A sister lineage of the *Mycobacterium tuberculosis* complex  
434 discovered in the African Great Lakes region. *Nat Commun* **11**, 2917 (2020).
- 435 13. Coll, F., *et al.* A robust SNP barcode for typing *Mycobacterium tuberculosis* complex  
436 strains. *Nat Commun* **5**, 4812 (2014).
- 437 14. Freschi, L., *et al.* Population structure, biogeography and transmissibility of  
438 *Mycobacterium tuberculosis*. *Nat Commun* **12**, 6099 (2021).
- 439 15. Gagneux, S. Host-pathogen coevolution in human tuberculosis. *Philosophical*  
440 *transactions of the Royal Society of London Series B, Biological sciences* **367**, 850-859  
441 (2012).
- 442 16. Guerra-Assuncao, J. A., *et al.* Large-scale whole genome sequencing of *M. tuberculosis*  
443 provides insights into transmission in a high prevalence area. *Elife* **4**, (2015).
- 444 17. Coscolla, M., Gagneux S. Consequences of genomic diversity in *Mycobacterium*  
445 tuberculosis. *Semin Immunol* **26**, 431-444 (2014).
- 446 18. Mathema, B., *et al.* Epidemiologic consequences of microvariation in *Mycobacterium*  
447 tuberculosis. *J Infect Dis* **205**, 964-974 (2012).

- 448 19. Gagneux, S., *et al.* Variable host-pathogen compatibility in *Mycobacterium tuberculosis*.  
449 *Proc Natl Acad Sci U S A* **103**, 2869-2873 (2006).
- 450 20. Zetola, N. M., *et al.* Protocol for a population-based molecular epidemiology study of  
451 tuberculosis transmission in a high HIV-burden setting: the Botswana Kopanyo study.  
452 *BMJ open* **6**, e010046 (2016).
- 453 21. Liu, Q., *et al.* China's tuberculosis epidemic stems from historical expansion of four  
454 strains of *Mycobacterium tuberculosis*. *Nat Ecol Evol* **2**, 1982-1992 (2018).
- 455 22. Dodd, P. J., *et al.* Transmission modeling to infer tuberculosis incidence prevalence and  
456 mortality in settings with generalized HIV epidemics. *Nat Commun* **14**, 1639 (2023).
- 457 23. Ramogola-Masire, D., *et al.* Botswana's HIV response: Policies, context, and future  
458 directions. *J Community Psychol* **48**, 1066-1070 (2020).
- 459 24. Wilkinson, E., Engelbrecht S., de Oliveira T. History and origin of the HIV-1 subtype C  
460 epidemic in South Africa and the greater southern African region. *Sci Rep* **5**, 16897  
461 (2015).
- 462 25. Corbett, E. L., *et al.* The growing burden of tuberculosis: global trends and interactions  
463 with the HIV epidemic. *Archives of internal medicine* **163**, 1009-1021 (2003).
- 464 26. Song, J., *et al.* Population mobility and the development of Botswana's generalized HIV  
465 epidemic: a network analysis. *medRxiv*, (2023).
- 466 27. UNAIDS. Botswana: Country Factsheets. UNAIDS (2004).
- 467 28. Stuckler, D., Basu S., McKee M., Lurie M. Mining and risk of tuberculosis in sub-  
468 Saharan Africa. *Am J Public Health* **101**, 524-530 (2011).

- 469 29. Basu, S., Stuckler D., Gonsalves G., Lurie M. The production of consumption: addressing  
470 the impact of mineral mining on tuberculosis in southern Africa. *Global Health* **5**, 11  
471 (2009).
- 472 30. Fenner, L., *et al.* HIV infection disrupts the sympatric host-pathogen relationship in  
473 human tuberculosis. *PLoS Genet* **9**, e1003318 (2013).
- 474 31. The World Bank. Incidence of tuberculosis in Botswana. The World Bank Group (2022).
- 475 32. Chin, R. J., Sangmanee D., Piergallini L. PEPFAR funding and reduction in HIV  
476 infection rates in 12 focus sub-Saharan African countries: a quantitative analysis. *Int J*  
477 *MCH AIDS* **3**, 150-158 (2015).
- 478 33. Farahani, M., *et al.* Outcomes of the Botswana national HIV/AIDS treatment programme  
479 from 2002 to 2010: a longitudinal analysis. *Lancet Glob Health* **2**, e44-50 (2014).
- 480 34. Mine, M., *et al.* Progress towards the UNAIDS 95-95-95 targets in the Fifth Botswana  
481 AIDS Impact Survey (BAIS V 2021): a nationally representative survey. *Lancet HIV* **11**,  
482 e245-e254 (2024).
- 483 35. O'Neill, M. B., *et al.* Lineage specific histories of Mycobacterium tuberculosis dispersal  
484 in Africa and Eurasia. *Mol Ecol* **28**, 3241-3256 (2019).
- 485 36. Menardo, F., *et al.* Local adaptation in populations of Mycobacterium tuberculosis  
486 endemic to the Indian Ocean Rim. *F1000Res* **10**, 60 (2021).
- 487 37. Couvin, D., Reynaud Y., Rastogi N. Two tales: Worldwide distribution of Central Asian  
488 (CAS) versus ancestral East-African Indian (EAI) lineages of Mycobacterium

- 489 tuberculosis underlines a remarkable cleavage for phylogeographical, epidemiological  
490 and demographical characteristics. *PLoS One* **14**, e0219706 (2019).
- 491 38. Holt, K. E., *et al.* Frequent transmission of the Mycobacterium tuberculosis Beijing  
492 lineage and positive selection for the EsxW Beijing variant in Vietnam. *Nat Genet* **50**,  
493 849-856 (2018).
- 494 39. Merker, M., *et al.* Evolutionary history and global spread of the Mycobacterium  
495 tuberculosis Beijing lineage. *Nat Genet* **47**, 242-249 (2015).
- 496 40. Altan, S. *Chinese Workers of the World: Colonialism, Chinese Labor, and the Yunnan–*  
497 *Indochina Railway*. Stanford University Press (2024).
- 498 41. Hanekom, M., *et al.* Mycobacterium tuberculosis Beijing genotype: a template for  
499 success. *Tuberculosis (Edinb)* **91**, 510-523 (2011).
- 500 42. Parwati, I., van Crevel R., van Soolingen D. Possible underlying mechanisms for  
501 successful emergence of the Mycobacterium tuberculosis Beijing genotype strains. *The*  
502 *Lancet Infectious diseases* **10**, 103-111 (2010).
- 503 43. Gagneux, S. Ecology and evolution of Mycobacterium tuberculosis. *Nat Rev Microbiol*  
504 **16**, 202-213 (2018).
- 505 44. Stucki, D., *et al.* Mycobacterium tuberculosis lineage 4 comprises globally distributed  
506 and geographically restricted sublineages. *Nat Genet* **48**, 1535-1543 (2016).
- 507 45. Mogashoa, T., *et al.* Genetic diversity of Mycobacterium tuberculosis strains circulating  
508 in Botswana. *PLoS One* **14**, e0216306 (2019).

- 509 46. Chihota, V. N., *et al.* Geospatial distribution of Mycobacterium tuberculosis genotypes in  
510 Africa. *PLoS One* **13**, e0200632 (2018).
- 511 47. Viegas, S. O., *et al.* Molecular diversity of Mycobacterium tuberculosis isolates from  
512 patients with pulmonary tuberculosis in Mozambique. *BMC Microbiol* **10**, 195 (2010).
- 513 48. Brynildsrud, O. B., *et al.* Global expansion of Mycobacterium tuberculosis lineage 4  
514 shaped by colonial migration and local adaptation. *Sci Adv* **4**, eaat5869 (2018).
- 515 49. Oliver, E., Oliver W. H. The colonisation of South Africa: a unique case. *HTS*  
516 *Theological Studies* **73**, 1-8 (2017).
- 517 50. Click, E. S., *et al.* Phylogenetic diversity of Mycobacterium tuberculosis in two  
518 geographically distinct locations in Botswana - The Kopanyo Study. *Infect Genet Evol* **81**,  
519 104232 (2020).
- 520 51. Statistics Botswana. Botswana AIDS Impact Survey IV 2013 (BAIS IV): Report.  
521 National AIDS & Health Promotion Agency (2013).
- 522 52. Moonan, P. K., *et al.* A neighbor-based approach to identify tuberculosis exposure, the  
523 Kopanyo study. *Emerging infectious diseases* **26**, 1010-1013 (2020).
- 524 53. Smith, J. P., *et al.* High-resolution characterization of nosocomial Mycobacterium  
525 tuberculosis transmission events in Botswana. *Am J Epidemiol* **192**, 503-506 (2023).
- 526 54. Smith, J. P., *et al.* Characterizing tuberculosis transmission dynamics in high-burden  
527 urban and rural settings. *Sci Rep* **12**, 6780 (2022).
- 528 55. Anderson, J., *et al.* Sublineages of lineage 4 (Euro-American) Mycobacterium  
529 tuberculosis differ in genotypic clustering. *Int J Tuberc Lung Dis* **17**, 885-891 (2013).



- 530 56. Lopez, M. G., *et al.* Deciphering the tangible spatio-temporal spread of a 25-year  
531 tuberculosis outbreak boosted by social determinants. *Microbiol Spectr* **11**, e0282622  
532 (2023).
- 533 57. Du, D. H., *et al.* The effect of *M. tuberculosis* lineage on clinical phenotype. *PLOS Glob*  
534 *Public Health* **3**, e0001788 (2023).
- 535 58. Click, E. S., Moonan P. K., Winston C. A., Cowan L. S., Oeltmann J. E. Relationship  
536 between *Mycobacterium tuberculosis* phylogenetic lineage and clinical site of  
537 tuberculosis. *Clin Infect Dis* **54**, 211-219 (2012).
- 538 59. Minin, V. N., Bloomquist E. W., Suchard M. A. Smooth skyride through a rough skyline:  
539 Bayesian coalescent-based inference of population dynamics. *Mol Biol Evol* **25**, 1459-  
540 1471 (2008).
- 541 60. Hatherell, H. A., *et al.* Interpreting whole genome sequencing for investigating  
542 tuberculosis transmission: a systematic review. *BMC medicine* **14**, 21 (2016).
- 543 61. Walker, T. M., *et al.* Whole-genome sequencing to delineate *Mycobacterium tuberculosis*  
544 outbreaks: a retrospective observational study. *The Lancet Infectious diseases* **13**, 137-  
545 146 (2013).
- 546 62. Zhang, X., *et al.* Exploring programmatic indicators of tuberculosis control that  
547 incorporate routine *Mycobacterium tuberculosis* sequencing in low incidence settings: a  
548 comprehensive (2017-2021) patient cohort analysis. *Lancet Reg Health West Pac* **41**,  
549 100910 (2023).

- 550 63. Statistics Botswana. Botswana Population and Housing Census. Statistics Botswana  
551 (2011).
- 552 64. Zetola, N. M., *et al.* Population-based geospatial and molecular epidemiologic study of  
553 tuberculosis transmission dynamics, Botswana, 2012–2016. *Emerging infectious diseases*  
554 **27**, 835-844 (2021).
- 555 65. Kohl, T. A., *et al.* MTBseq: a comprehensive pipeline for whole genome sequence  
556 analysis of Mycobacterium tuberculosis complex isolates. *PeerJ* **6**, e5895 (2018).
- 557 66. Nguyen, L. T., Schmidt H. A., von Haeseler A., Minh B. Q. IQ-TREE: a fast and effective  
558 stochastic algorithm for estimating maximum-likelihood phylogenies. *Mol Biol Evol* **32**,  
559 268-274 (2015).
- 560 67. Hasegawa, M., Kishino H., Yano T. Dating of the human-ape splitting by a molecular  
561 clock of mitochondrial DNA. *J Mol Evol* **22**, 160-174 (1985).
- 562 68. Suchard, M. A., *et al.* Bayesian phylogenetic and phylodynamic data integration using  
563 BEAST 1.10. *Virus Evol* **4**, vey016 (2018).
- 564 69. Menardo, F., Duchene S., Brites D., Gagneux S. The molecular clock of Mycobacterium  
565 tuberculosis. *PLoS Pathog* **15**, e1008067 (2019).
- 566 70. R Core Team. R: a language and environment for statistical computing. R Foundation for  
567 Statistical Computing.
- 568

569 **Acknowledgements**

570 We would like to thank the participants who made this research possible.

571

572 **Author contributions**

573 These authors contributed equally: Sanghyuk S. Shin and Stefan Neimann.

574 Q.W. contributed to project conception, performed the data analysis, and drafted the manuscript.

575 I.B. and S.N. processed the whole genome sequencing data and performed the bioinformatic

576 analysis. C.M., N.Z., P.K.M., A.F., R.B., J.E.O., and T.L.M. contributed to the Kopanyo Study

577 design, participant recruitment, data collection, and quality control. V.M.M., S.S.S., and T.F.B.

578 contributed to project conception, supervised data analysis and interpretation of results. All

579 authors were involved in revising the manuscript and approved the final version.

580

581 **Corresponding author**

582 Correspondence to Sanghyuk S. Shin.

583

584 **Competing interests**

585 The authors declare no competing interests.

586 **Table 1. Distribution of *Mycobacterium tuberculosis* complex lineages by district in**  
 587 **Botswana, 2012–2016**

|                                      | District          |                 | Total<br>n (%) |
|--------------------------------------|-------------------|-----------------|----------------|
|                                      | Gaborone<br>n (%) | Ghanzi<br>n (%) |                |
| <b>Lineage 1 Indo-Oceanic</b>        | 83 (7.6)          | 3 (1.2)         | 86 (6.4)       |
| L1.1                                 | 22 (2.0)          | 0               | 22 (1.6)       |
| L1.2                                 | 61 (5.6)          | 3 (1.2)         | 64 (4.7)       |
| <b>Lineage 2 East Asian</b>          |                   |                 |                |
| L2.2                                 | 65 (5.9)          | 7 (2.7)         | 72 (5.3)       |
| <b>Lineage 3 East African-Indian</b> | 12 (1.1)          | 0               | 12 (0.9)       |
| <b>Lineage 4 Euro-American</b>       | 938 (85.4)        | 246 (96.1)      | 1184 (87.4)    |
| L4.1                                 | 2 (0.2)           | 0               | 2 (0.1)        |
| L4.1.1                               | 136 (12.4)        | 5 (2.0)         | 141 (10.4)     |
| L4.1.2                               | 129 (11.7)        | 20 (7.8)        | 149 (11.0)     |
| L4.2.2                               | 1 (0.1)           | 0               | 1 (0.1)        |
| L4.3.2                               | 107 (9.7)         | 10 (3.9)        | 117 (8.6)      |
| L4.3.3                               | 24 (2.2)          | 3 (1.2)         | 27 (2.0)       |
| L4.3.4                               | 229 (20.9)        | 171 (66.8)      | 400 (29.5)     |
| L4.4                                 | 164 (14.9)        | 25 (9.8)        | 189 (14.0)     |
| L4.6                                 | 2 (0.2)           | 0               | 2 (0.1)        |
| L4.7                                 | 13 (1.2)          | 1 (0.4)         | 14 (1.0)       |
| L4.8                                 | 84 (7.7)          | 8 (3.1)         | 92 (6.8)       |
| L4.9                                 | 47 (4.3)          | 3 (1.2)         | 50 (3.7)       |
| <b>Total</b>                         | 1098 (100)        | 256 (100)       | 1354 (100)     |

588

589

590 **Table 2. Participant characteristics by *Mycobacterium tuberculosis*–complex (Mtb) lineages in Botswana, 2012–2016**  
 591

|                                     | Mtb lineage |             |             |             | Total<br>n (%) |
|-------------------------------------|-------------|-------------|-------------|-------------|----------------|
|                                     | L1<br>n (%) | L2<br>n (%) | L3<br>n (%) | L4<br>n (%) |                |
| <b>Sex</b>                          |             |             |             |             |                |
| Female                              | 35 (40.7)   | 38 (52.8)   | 6 (50.0)    | 522 (44.1)  | 601 (44.4)     |
| Male                                | 51 (59.3)   | 34 (47.2)   | 6 (50.0)    | 662 (55.9)  | 753 (55.6)     |
| <b>Age</b>                          |             |             |             |             |                |
| <=15                                | 2 (2.3)     | 3 (4.2)     | 1 (8.3)     | 21 (1.8)    | 27 (2.0)       |
| 16-24                               | 10 (11.6)   | 9 (12.5)    | 1 (8.3)     | 226 (19.1)  | 246 (18.2)     |
| 25-40                               | 47 (54.7)   | 46 (63.9)   | 7 (58.3)    | 632 (53.4)  | 732 (54.1)     |
| 41-64                               | 24 (27.9)   | 14 (19.4)   | 3 (25.0)    | 280 (23.6)  | 321 (23.7)     |
| >=65                                | 3 (3.5)     | 0           | 0           | 25 (2.1)    | 28 (2.1)       |
| <b>Previous TB</b>                  |             |             |             |             |                |
| No                                  | 63 (73.3)   | 57 (79.2)   | 10 (83.3)   | 967 (81.7)  | 1097 (81.0)    |
| Yes                                 | 23 (26.7)   | 15 (20.8)   | 2 (16.7)    | 217 (18.3)  | 257 (19.0)     |
| <b>Isoniazid preventive therapy</b> |             |             |             |             |                |
| No                                  | 83 (96.5)   | 64 (88.9)   | 12 (100.0)  | 1127 (95.2) | 1286 (95.0)    |
| Yes                                 | 2 (2.3)     | 5 (6.9)     | 0           | 42 (3.5)    | 49 (3.6)       |
| Unknown                             | 1 (1.2)     | 3 (4.2)     | 0           | 15 (1.3)    | 19 (1.4)       |
| <b>AFB smear results</b>            |             |             |             |             |                |
| Negative                            | 5 (5.8)     | 7 (9.7)     | 3 (25.0)    | 76 (6.4)    | 91 (6.7)       |
| Positive                            | 61 (70.9)   | 46 (63.9)   | 8 (66.7)    | 752 (63.5)  | 867 (64.0)     |
| Not done                            | 20 (23.3)   | 19 (26.4)   | 1 (8.3)     | 356 (30.1)  | 396 (29.2)     |
| <b>TB type</b>                      |             |             |             |             |                |
| Pulmonary                           | 79 (91.9)   | 65 (90.3)   | 11 (91.7)   | 1075 (90.8) | 1230 (90.8)    |
| Extrapulmonary                      | 7 (8.1)     | 6 (8.3)     | 0           | 105 (8.9)   | 118 (8.7)      |
| Unknown                             | 0           | 1 (1.4)     | 1 (8.3)     | 4 (0.3)     | 6 (0.4)        |
| <b>HIV status</b>                   |             |             |             |             |                |
| Negative                            | 27 (31.4)   | 27 (37.5)   | 5 (41.7)    | 533 (45.0)  | 592 (43.7)     |
| Positive                            | 56 (65.1)   | 42 (58.3)   | 7 (58.3)    | 616 (52.0)  | 721 (53.2)     |
| Unknown                             | 3 (3.5)     | 3 (4.2)     | 0           | 35 (3.0)    | 41 (3.0)       |
| <b>ART status<sup>1</sup></b>       |             |             |             |             |                |
| Never taken ART                     | 26 (46.4)   | 17 (40.5)   | 1 (14.3)    | 278 (45.1)  | 322 (44.7)     |
| Taking ART                          | 25 (44.6)   | 20 (47.6)   | 3 (42.9)    | 277 (45.0)  | 325 (45.1)     |
| Took ART but stopped                | 1 (1.8)     | 1 (2.4)     | 2 (28.6)    | 11 (1.8)    | 15 (2.1)       |
| Unknown                             | 4 (7.1)     | 4 (9.5)     | 1 (14.3)    | 50 (8.1)    | 59 (8.2)       |

592 Abbreviations: AFB: acid-fast bacilli. ART: antiretroviral therapy.

593 <sup>1</sup>Among HIV-positive individuals only.

594

595 **Table 3. Time to most recent common ancestor (tMRCA) of *Mycobacterium tuberculosis*–**  
596 **complex lineages in Botswana**

| <b>Lineage</b> | <b>tMRCA<br/>(Posterior mean)</b> | <b>tMRCA<br/>(Posterior median)</b> | <b>95% HPD interval</b> |
|----------------|-----------------------------------|-------------------------------------|-------------------------|
| L1             | 1727                              | 1736                                | 1607 – 1828             |
| L2             | 1900                              | 1903                                | 1854 – 1938             |
| L4.1.1         | 1729                              | 1739                                | 1587 – 1842             |
| L4.1.2         | 1695                              | 1705                                | 1546 – 1817             |
| L4.3.2         | 1941                              | 1943                                | 1911 – 1966             |
| L4.3.4         | 1808                              | 1814                                | 1723 – 1881             |
| L4.4           | 1739                              | 1748                                | 1621 – 1847             |
| L4.8           | 1853                              | 1858                                | 1782 – 1912             |

597 Abbreviations: HPD: highest posterior density.

598

599 **Table 4. Genomic cluster proportions (based on a 5-SNPs cutoff) of the *Mycobacterium***  
600 ***tuberculosis*–complex lineages**

| <b>Lineage</b> | <b>Cluster proportions</b> | <b>Crude OR (95% CI)</b> | <b>Adjusted<sup>1</sup> OR (95% CI)</b> |
|----------------|----------------------------|--------------------------|-----------------------------------------|
| L1             | 25/86                      | 1                        | 1                                       |
| L2             | 42/72                      | 3.42 (1.78, 6.69)        | 3.26 (1.68, 6.47)                       |
| L4.1.1         | 83/141                     | 3.49 (1.99, 6.28)        | 3.44 (1.94, 6.25)                       |
| L4.1.2         | 74/149                     | 2.41 (1.38, 4.29)        | 2.26 (1.28, 4.07)                       |
| L4.3.2         | 52/117                     | 1.95 (1.09, 3.56)        | 1.91 (1.05, 3.52)                       |
| L4.3.4         | 190/400                    | 2.21 (1.35, 3.71)        | 1.68 (1.00, 2.89)                       |
| L4.4           | 82/189                     | 1.87 (1.09, 3.27)        | 1.78 (1.03, 3.16)                       |
| L4.8           | 55/92                      | 3.63 (1.96, 6.86)        | 3.27 (1.74, 6.26)                       |

601 Abbreviations: SNP: single nucleotide polymorphism. OR: odds ratio. CI: confidence interval.

602 <sup>1</sup>Adjusted for age, gender, HIV status, and district.

603

604

605 **Figure 1. Maximum likelihood phylogeny of *Mycobacterium tuberculosis*-complex (MtbC)**  
606 **isolates collected in Botswana, 2012–2016 (n = 1,354).**

607 A. Phylogeny of Lineage 1 Indo-Oceanic MtbC isolates (n = 86). B. Phylogeny of Lineage 2 East  
608 Asian MtbC isolates (n = 72). C. Phylogeny of Lineage 3 East African-Indian MtbC isolates (n =  
609 12). D. Phylogeny of Lineage 4 Euro-American MtbC isolates (n = 1184)

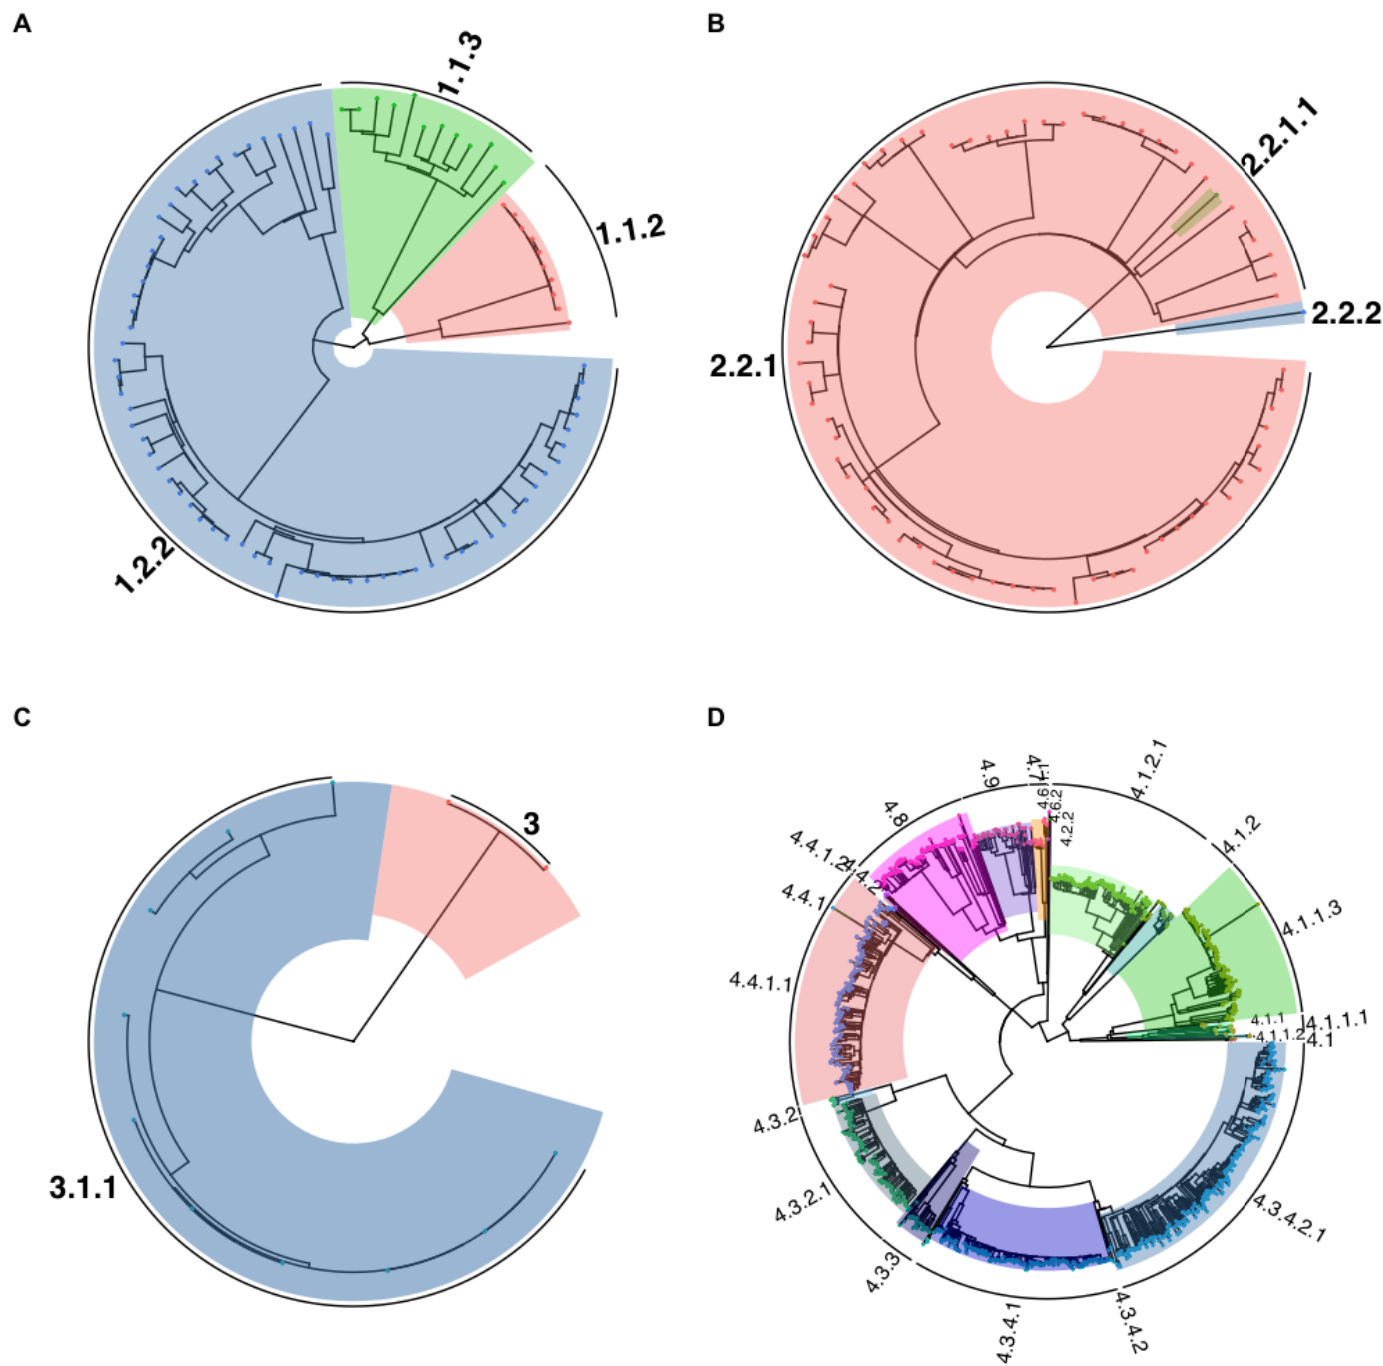

610  
611



612 **Figure 2. Inferred effective population size over time for *Mycobacterium tuberculosis*-**  
613 **complex lineages circulating in Botswana**

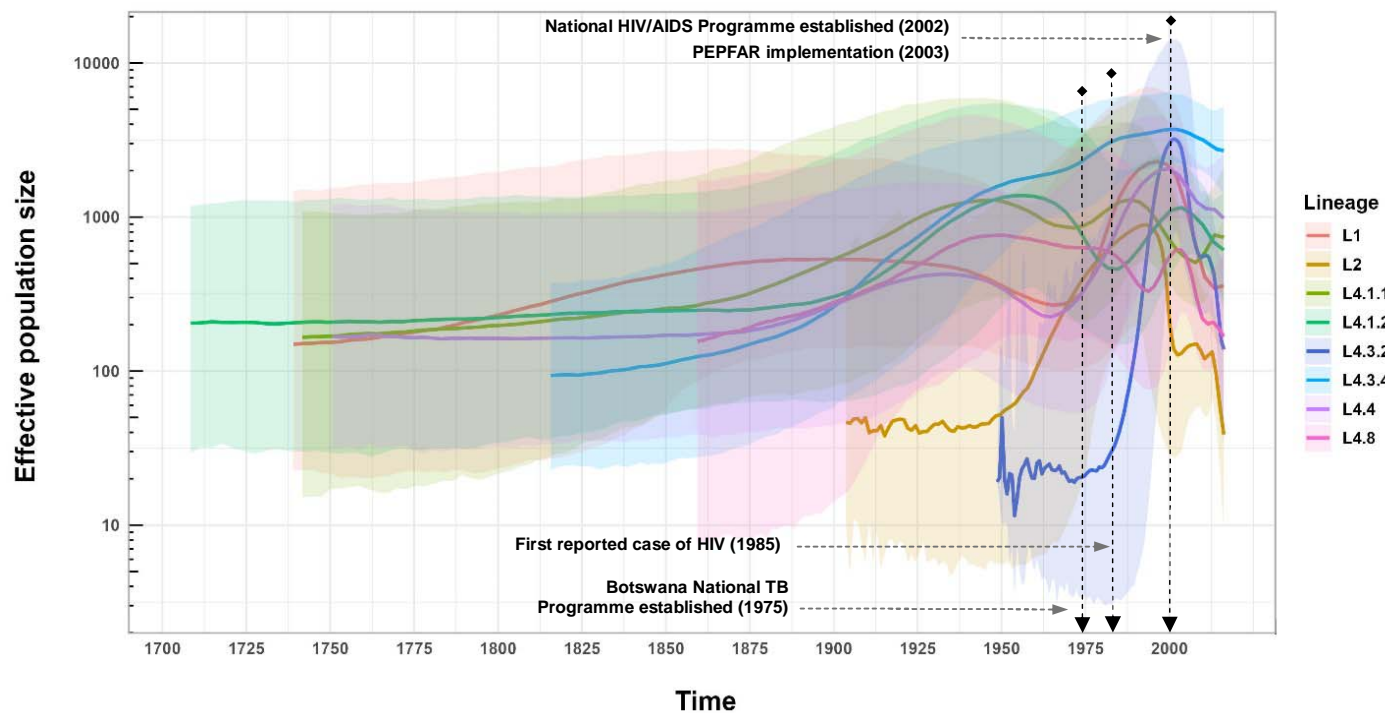

614  
615  
616  
617
